# Supplementary material
Source: PubMed Central journal article supplement (PMC2830338)
Supplement: NIHMS178522-supplement-1_si_001.pdf [file NIHMS178522-supplement-1_si_001.pdf]

Table S1.

Phospholipid internal calibrants used for measuring phospholipid CCS values directly from tissue sections. These values were originally published by Fenn et al.<sup>1</sup>

| Species | Ion Type                   | $m/z$ | CCS ( $\text{\AA}^2$ ) |
|---------|----------------------------|-------|------------------------|
| SM 18:0 | $[\text{M} + \text{H}]^+$  | 731.6 | 221.1                  |
|         | $[\text{M} + \text{Na}]^+$ | 753.6 | 221.3                  |
| PC 34:2 | $[\text{M} + \text{H}]^+$  | 758.6 | 217.4                  |
|         | $[\text{M} + \text{Na}]^+$ | 780.6 | 218.9                  |
| SM 20:0 | $[\text{M} + \text{H}]^+$  | 759.7 | 229.8                  |
|         | $[\text{M} + \text{Na}]^+$ | 781.6 | 231.3                  |
| PC 34:1 | $[\text{M} + \text{H}]^+$  | 760.6 | 219.1                  |
|         | $[\text{M} + \text{Na}]^+$ | 782.6 | 221.7                  |
| PC 36:2 | $[\text{M} + \text{H}]^+$  | 786.6 | 222.6                  |
|         | $[\text{M} + \text{Na}]^+$ | 808.6 | 226.7                  |
| PC 36:1 | $[\text{M} + \text{H}]^+$  | 788.6 | 227.4                  |
|         | $[\text{M} + \text{Na}]^+$ | 810.6 | 228.1                  |
| PC 42:0 | $[\text{M} + \text{Na}]^+$ | 896.7 | 246.3                  |

Table S2.

BSA tryptic peptide CCS external calibrants used for measuring phospholipid CCS values directly from tissue sections. These values were originally published by Tao et al. and measured by MALDI drift cell IM-TOFMS.<sup>2</sup>

| Peptide Amino Acid Sequence | $m/z$<br>[M + H] <sup>+</sup> | CCS (Å <sup>2</sup> ) |
|-----------------------------|-------------------------------|-----------------------|
| VASLR <sup>ab</sup>         | 545.66                        | 159                   |
| CASIQK <sup>ab</sup>        | 649.33                        | 182                   |
| AWSVAR <sup>a</sup>         | 689.37                        | 189                   |
| SEIAHR <sup>a</sup>         | 712.37                        | 188                   |
| AEFVEVTK <sup>a</sup>       | 922.49                        | 231                   |
| YLYEIAR <sup>a</sup>        | 927.49                        | 244                   |
| CCTESLVNR <sup>a</sup>      | 1024.46                       | 252                   |
| LVNELTEFAK                  | 1163.63                       | 279                   |
| FKDLGEEHFK <sup>a</sup>     | 1249.62                       | 290                   |
| HPEYAVSVLLR <sup>a</sup>    | 1283.71                       | 309                   |
| HLVDEPQNLIK                 | 1305.72                       | 301                   |
| RHPEYAVSVLLR                | 1439.81                       | 321                   |
| LGEYGFQNALIVR               | 1479.80                       | 331                   |
| DAFLGSFLYEYSR               | 1567.74                       | 343                   |
| KVPQVSTPTLVEVSR             | 1639.94                       | 349                   |
| RPCSALTPDETYVPK             | 1823.90                       | 364                   |
| HPYFYAPELLYYANK             | 1888.93                       | 384                   |
| RHPYFYAPELLYYANK            | 2045.03                       | 397                   |

<sup>a</sup>Peptide CCS calibrants used for determining phospholipid CCS values. CCS values of these peptides measured using ESI IM-TOFMS and reported by Valentine et al.<sup>3</sup> were used for comparison.

<sup>b</sup>Peptide CCS Calibrants used only for determining phospholipid CCS values and not tryptic peptide CCS values.
